# Supplementary material for: Predictive learning shapes the representational geometry of the human brain
Source: Springer Nature journal article supplement (doi:10.1038/s41467-024-54032-4), 2024-11-08
Supplement: MOESM1 [file 41467_2024_54032_MOESM1_ESM.pdf]

# Supplementary Material

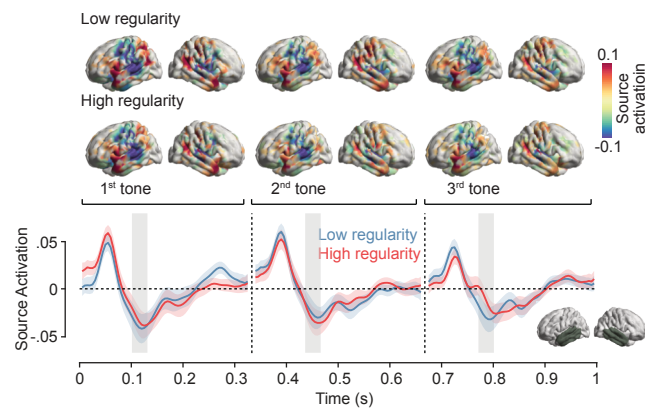

**Fig. S1 | Stimulus space and auditory cortical responses.** Top: Cortical distribution of evoked activity 100-120 ms post onset of each of the three tones in a triplet. Bottom: source-reconstructed evoked activity in bilateral temporal cortices (bottom right inset) across triplets in the low and high regularity sequences. Shaded areas indicate standard error of the mean (SEM).
